# Supplementary material for: A Phase IIa Multicenter, Randomized, Vehicle-Controlled, Dose Escalating Study to Evaluate the Safety, Efficacy, and Pharmacokinetics of CBT-001 Ophthalmic Solution in Patients With Primary or Recurrent Pterygium
Source: PubMed Central journal article supplement (PMC11179250; doi:10.1016/j.xops.2024.100502), 2024-03-04
Supplement: mmc1.pdf [file mmc1.pdf]

**Table S1. Pterygium Symptom and Life Quality (PSLQ) Questionnaire**

| <b>Pterygium Symptom and Life Quality (PSLQ) Questionnaire ----- To be completed by the subject</b>       |                 |                  |                  |                  |                  |    |
|-----------------------------------------------------------------------------------------------------------|-----------------|------------------|------------------|------------------|------------------|----|
| <b>Please answer the following questions by marking the box that best represents your answer</b>          |                 |                  |                  |                  |                  |    |
| <b>Ocular symptoms</b>                                                                                    |                 |                  |                  |                  |                  |    |
| Have you experienced any of the following in the affected eye during the <b>last week</b> ?               | All of the Time | Most of the Time | Half of the Time | Some of the Time | None of the Time | NA |
| 1. Sensitive to light?                                                                                    |                 |                  |                  |                  |                  |    |
| 2. Feeling gritty?                                                                                        |                 |                  |                  |                  |                  |    |
| 3. Painful or sore eye?                                                                                   |                 |                  |                  |                  |                  |    |
| 4. Red eye?                                                                                               |                 |                  |                  |                  |                  |    |
| 5. Blurred vision?                                                                                        |                 |                  |                  |                  |                  |    |
| 6. Poor vision?                                                                                           |                 |                  |                  |                  |                  |    |
| <b>Vision-related functioning</b>                                                                         |                 |                  |                  |                  |                  |    |
| Have problems with your eyes limited you in performing any of the following during the <b>last week</b> ? | All of the Time | Most of the Time | Half of the Time | Some of the Time | None of the Time | NA |
| 7. Reading?                                                                                               |                 |                  |                  |                  |                  |    |
| 8. Driving at night?                                                                                      |                 |                  |                  |                  |                  |    |
| 9. Working with a computer or bank machine (ATM)?                                                         |                 |                  |                  |                  |                  |    |
| 10. Watching television?                                                                                  |                 |                  |                  |                  |                  |    |
| <b>Quality of life</b>                                                                                    |                 |                  |                  |                  |                  |    |
| Has the appearance of the affected eye impacted the quality of life during the <b>last week</b> ?         | All of the Time | Most of the Time | Half of the Time | Some of the Time | None of the Time | NA |
| 11. Worry about eye appearance?                                                                           |                 |                  |                  |                  |                  |    |
| 12. Keeping you from doing what you would like to be doing?                                               |                 |                  |                  |                  |                  |    |
| 13. Accomplishing less than you would like?                                                               |                 |                  |                  |                  |                  |    |
| 14. Worry about doing things that will embarrass yourself or others?                                      |                 |                  |                  |                  |                  |    |
| 15. Staying home most of the time?                                                                        |                 |                  |                  |                  |                  |    |
| Subject, please initial and date:                                                                         |                 |                  |                  |                  |                  |    |
| Name:                                                                                                     |                 | Date:            |                  |                  |                  |    |
