# Supplementary material for: A Phase IIa Multicenter, Randomized, Vehicle-Controlled, Dose Escalating Study to Evaluate the Safety, Efficacy, and Pharmacokinetics of CBT-001 Ophthalmic Solution in Patients With Primary or Recurrent Pterygium
Source: PubMed Central journal article supplement (PMC11179250; doi:10.1016/j.xops.2024.100502), 2024-03-04
Supplement: mmc2.pdf [file mmc2.pdf]

|              | Primary gaze                                                                        | Lateral gaze                                                                        | Definitions                                                                                                                                                                           |
|--------------|-------------------------------------------------------------------------------------|-------------------------------------------------------------------------------------|---------------------------------------------------------------------------------------------------------------------------------------------------------------------------------------|
| 0            | 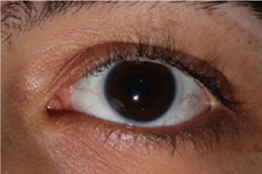   |    | There is no pterygium tissue present                                                                                                                                                  |
| 1 (trace)    |    |    | Pterygium tissue is translucent, similar to conjunctiva<br>Episcleral vessels under the body of the pterygium are easily visible<br>Minimally dilated vessels with slightly increased |
| 2 (mild)     |   |   | Pterygium tissue is pink<br>Episcleral vessels under the body of the pterygium are distinguishable<br>Dilated vessels with increased density                                          |
| 3 (moderate) |  |  | Pterygium tissue is red<br>Episcleral vessels under the body of the pterygium are not distinguishable<br>Significant tortuous and engorged vessels with minimal                       |
| 4 (severe)   |  |  | Pterygium tissue is deep bright diffuse red, very thick<br>Episcleral vessels and tissues under the body of the pterygium are totally obscured<br>Dense network of engorged vessels   |

**Figure S2. Pterygium hyperemia grading scale. From Huang P, Huang J, Tepelus T, Maram J, Sadda S, Lee OL. Validity of a new comprehensive pterygia grading scale for use in clinical research and clinical trial. *Int Ophthalmol.* 2018;38(6):2303-2311 with permission.**
